# Supplementary material for: Oligonol ameliorates liver function and brain function in the 5 × FAD mouse model: transcriptional and cellular analysis
Source: Royal Society of Chemistry journal article supplement (doi:10.1039/d3fo03451h), 2023-01-01
Supplement: d3fo03451h1.xlsx [file d3fo03451h1.xlsx]

## Sheet: Sheet1
	Mouse
	Name	Forward sequence	Reverse sequence
	Gclc	GTTATGGCTTTGAGTGCTGCAT	ATCACTCCCCAGCGACAATC
	Gpx-1	CCAGGAGAATGGCAAGAATGA	TCTCACCATTCACTTCGCACTT
	Sod2	TCTCACCATTCACTTCGCACTT	GGTGGCGTTGAGATTGTTCA
	G6pdh	CTGGAACCGCATCATCGTGGAG	CCTGATGATCCCAAATTCATCAAAATAG
	Pepck	AACTGTTGGCTGGCTCTC	GAACCTGGCGTTGAATGC
	Pgc1α	TATGGAGTGACATAGAGTGTGCT	CCACTTCAATCCACCCAGAAAG
	Fos	CTGTCCGTCTCTAGTGCCAAC	CCTCCTGACACGGTCTTCAC
	Psd95	GGTAACTCAGGTCTGGGCTTC	CACTGCAGCTGAATGGGTCA
	Syp	ACATGCAAGGAACTGAGGGA	CCAGGTTCAGGAAGCCAAAC
	Cyp2e1	CTTTGCAGGAACAGAGACCA	ATGCACTACAGCGTCCATGA
	Cyp4a10	CAACTTGCCCATGATCACACA	CATCCTGCAGCTGATCCTTTC
	Gapdh	AATGTGTCCGTCGTGGATCT	AGACAACCTGGTCCTCAGTG
