# Supplementary material for: Oligonol ameliorates liver function and brain function in the 5 × FAD mouse model: transcriptional and cellular analysis
Source: Royal Society of Chemistry journal article supplement (doi:10.1039/d3fo03451h), 2023-01-01
Supplement: d3fo03451h2.pdf [file d3fo03451h2.pdf]

**5xFAD mouse (n=6)**

```
graph TD; A["5xFAD mouse (n=6)"] --> B["Oligonucleotide treatment orally (50mg/kg/day) (n=3)"]; A --> C["Placebo (same volume of water) (n=3)"];
```

Oligonucleotide treatment orally  
(50mg/kg/day)  
(n=3)

Placebo  
(same volume of water )  
(n=3)
