# Supplementary figures and images for: Oligonol ameliorates liver function and brain function in the 5 × FAD mouse model: transcriptional and cellular analysis
Source: Royal Society of Chemistry journal article supplement (doi:10.1039/d3fo03451h), 2023-01-01

**A**

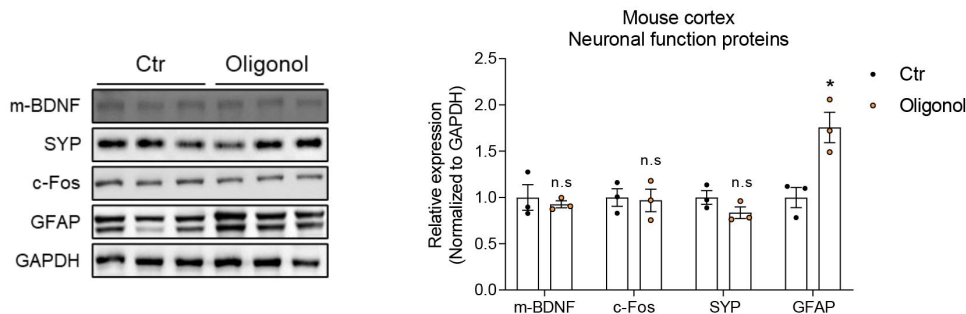

**B**

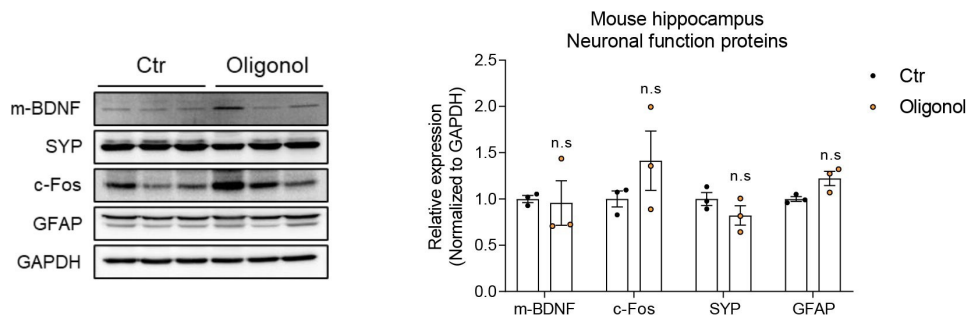

**C**

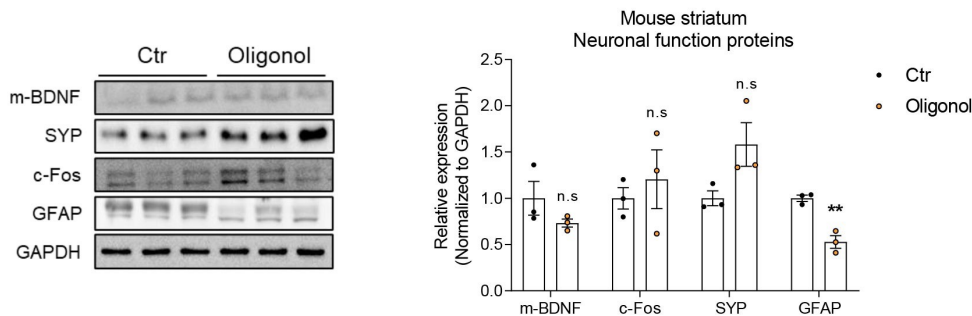

Supplement: d3fo03451h3.pdf [file d3fo03451h3.pdf]
